# Supplementary material for: FGF21 inhibited NETs formation induced by myocardial I/R injury via AMPK
Source: Research Square preprint supplement (doi:10.21203/rs.3.rs-4111215/v1), 2024-03-26
Supplement: Supplementary file 1 [file a32030ec6fbe328593e8c15e.docx]

**Figure legend**

**Figure 1** FGF21 inhibited I/R injury in myocardial tissue (TTC staining). (A) TTC staining of myocardial tissue. (B) Myocardial Infarction Volume Calculated Based on TTC Staining. *P<0.05, compared to control group; #P<0.05, compared to I/R group.

**Figure 2** Myocardial tissue after myocardial I/R injury in mice pretreated with FGF21 (HE staining, ×400).

**Figure 3** NETs formation in myocardial necrotic tissues was detected after the establishment of a myocardial I/R injury model in FGF21 pretreated mice (immunofluorescence, ×400).

**Figure 4** Measurement of peripheral serum dsDNA levels in FGF21 pretreated mice using the PicoGreen assay. *P<0.05, compared to control group; #P<0.05, compared to I/R group.

**Figure 5** Myocardial tissue after myocardial I/R injury in mice pretreated with AMPK inhibitor (HE staining, ×400).

**Figure 6** NETs formation in myocardial necrotic tissues was detected after the establishment of a myocardial I/R injury model in Compound C pretreated mice (immunofluorescence, ×400).

**Figure 7** Measurement of peripheral serum dsDNA levels in Compound C pretreated mice using the PicoGreen assay. *P<0.05, compared to control group; #P<0.05, compared to I/R group.

**Figure 8** The interaction of FGF21 and AMPK was detected in a mouse model of myocardial I/R injury or in an H/R model of H9c2 cells. (A) AMPK protein expression levels were measured in mice pre-injected with FGF21. (B) FGF21 protein expression levels were measured in mice pre-injected with AMPK inhibitor Compound C. (C) FGF21 protein expression levels were measured in H9c2 cells pretreated with Compound C, an inhibitor of AMPK, or with AICAR, an agonist. *P<0.05, compared to control; #P<0.05, compared to I/R group; &P<0.05, compared to H/R+Compound C group.
